# Supplementary material
Source: ML conference proceedings conference paper supplement (https://proceedings.neurips.cc/paper_files/paper/2022/hash/ffdb280e7c7b4c4af30e04daf5a84b98-Abstract.html)
Supplement: Supplementary file 1 [file ffdb280e7c7b4c4af30e04daf5a84b98-Supplemental-Conference.pdf]

## A Algorithm for OTKGE

**Compared with the existing models.** For the case of multi-modal KGEs, previous models such as IKRL learn the unified representation by concat or taking the mean of multi-modal representations. In this way, IKRL neglects the discrepancy of different multi-modal representations and it will harm the use of modal information. In contrast to this, OTKGE can measure distances between different multi-modal spaces by Wasserstein distance and consider the various distributional differences in these spaces. Intuitively, OTKGE can move different modal embeddings to a unified aligned space by an optimal transport plan while overcoming spatial heterogeneity by minimizing the Wasserstein distance between different distributions. It makes the process of multi-modal fusion more interpretational. In this sense, one can see that OTKGE shows strong advantages in multi-modal fusion.

## B Proofs of Theorem 1

**Definition 1**  $f \in \mathcal{F}$  is called  $K$ -Lipschitz continuous,  $\forall \mathbf{a}, \mathbf{b} \in \mathcal{D}$  (where  $\mathcal{D} \in \mathbb{R}^n$ ) if  $|f(\mathbf{a}) - f(\mathbf{b})| \leq Kd(\mathbf{a}, \mathbf{b})$ .

Here are the proof for Theorem 1:

**Proof** First of all, we prove that  $|f - f'|$  is  $2K$ -Lipschitz continuous given  $K$ -Lipschitz continuous hypotheses  $f, f' \in \mathcal{F}$ . we can derive the following formula with using the triangle inequality:

$$\begin{aligned} |f(x) - f'(x)| &\leq |f(x) - f(y)| + |f(y) - f'(x)| \\ &\leq |f(x) - f(y)| + |f(y) - f'(y)| + |f'(y) - f'(x)| \end{aligned} \quad (7)$$

Suppose  $d(x, y)$  represents a function to measure the distance between  $x$  and  $y$ , for every  $x, y \in \mathcal{X}$ , then we have:

$$\begin{aligned} \frac{|f(x) - f'(x)| - |f(y) - f'(y)|}{d(x, y)} &\leq \frac{|f(x) - f(y)| + |f'(x) - f'(y)|}{d(x, y)} \\ &\leq 2K \end{aligned} \quad (8)$$

In this step, we can find that for every hypothesis  $f, f'$ , given two distributions  $\mu_s$  and  $\mu_t$  (here  $\mu_s$  is the multi-modal distribution while  $\mu_t$  is the structural distribution), here we have

$$\begin{aligned} \epsilon_t(f, f') - \epsilon_s(f, f') &= \mathbb{E}_{x \sim \mu_t} [|f(x) - f'(x)|] - \mathbb{E}_{x \sim \mu_s} [|f(x) - f'(x)|] \\ &\leq \sup_{\|f\|_L \leq 2K} \mathbb{E}_{\mu_t}[f(x)] - \mathbb{E}_{\mu_s}[f(x)] \\ &\leq 2K\mathcal{W}_1(\mu_s, \mu_t) \end{aligned} \quad (9)$$

where  $\mathcal{W}_1(\mu_s, \mu_t)$  is the 1-Wasserstein distance. Then we can derive the following formula:

$$\epsilon_t(f) \leq \epsilon_s(f) + 2K\mathcal{W}_1(\mu_s, \mu_t) \quad (10)$$

By changing  $s, t$ , we have:

$$\begin{aligned} \epsilon_I(f) &\leq \epsilon_F(f) + 2K\mathcal{W}_1(\mu_I, \mu_F) \\ \epsilon_V(f) &\leq \epsilon_F(f) + 2K\mathcal{W}_1(\mu_V, \mu_F) \\ \epsilon_S(f) &\leq \epsilon_F(f) + 2K\mathcal{W}_1(\mu_S, \mu_F) \\ \epsilon_F(f) &\leq \epsilon_I(f) + 2K\mathcal{W}_1(\mu_I, \mu_F) \\ \epsilon_F(f) &\leq \epsilon_V(f) + 2K\mathcal{W}_1(\mu_V, \mu_F) \\ \epsilon_F(f) &\leq \epsilon_S(f) + 2K\mathcal{W}_1(\mu_S, \mu_F) \end{aligned}$$

Then the proof is completed.
